# Supplementary material
Source: publisher figshare collection journal article supplement (https://acs.figshare.com/ndownloader/files/5841159)
Supplement: Supplementary file 1 [file 5841159]

# Supporting Information for Self-Organised Heteroditopic Macrocyclic Superstructures

Mihail Barboiu,<sup>\*a</sup> Gavin Vaughan<sup>b</sup> and Arie van der Lee<sup>a</sup>

<sup>a</sup> Institut Européen des Membranes - UMR CNRS 5635, Place Eugène Bataillon, CC 047, F-34095 Montpellier, France.

<sup>b</sup> European Synchrotron Radiation Facility, ESRF, BP 220, 38043, Grenoble Cedex France.

barboiu@iemm.univ-montp2.fr

## Experimental Procedure and full characterization for compound 1

**4-phenylurea-benzo-15-crown-5, 1** was prepared by refluxing phenylisocyanate and 4'-aminobenzo-15-crown-5 (1.5/1 mol/mol) in CHCl<sub>3</sub> (5 h). After removal of the solvent, the residue was recrystallized in CH<sub>3</sub>CN to afford **1** (90 % yield). **1**, (yield =93%). <sup>1</sup>H NMR (CDCl<sub>3</sub>) δ = 4.01 (m, 12H), 6.27 (m, 1H), 6.56 (d, *J*= 3.81 Hz, 1H); 6.95 (m, 2H); 7.21 (m, 6H), 8.17 (s, 1H), 8.36 (s, 1H); <sup>13</sup>C NMR (CDCl<sub>3</sub>) δ= 68.54, 69.74, 70.45, 71.21, 108.61, 114.40, 115.34, 120.14, 123.19, 129.34, 133.00, 139.38, 145.45, 149.58, 154.68; ES-MS: *m/z* (%): 403 (100) MH<sup>+</sup>. C<sub>21</sub>H<sub>26</sub>N<sub>2</sub>O<sub>6</sub> (402.4 g/mol): calcd C 62.67, H 6.51, N 6.96; found C 62.49, H 6.33, N 7.10.

## Cooperative association model for calculation of dimerization (K<sub>2</sub>) and association (K<sub>a</sub>) constants of 1

The association dynamic equilibria of **1** were treated with a cooperative association model as previously described in references 9. Namely, one assumes that all oligomerization constants K<sub>a</sub> are the same and the first dimerization constant K<sub>2</sub> is different.

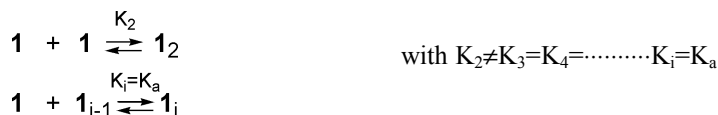

The concentration dependency of the chemical shifts presented in Figure 1, can now be described with Equation (1)<sup>8a</sup> and gives the association constants K<sub>2</sub> and K<sub>a</sub>.

$$\frac{(1-P_f)^{1/2}}{(2P_f - 1) c^{1/2}} = K_2^{1/2} + K_a \frac{P_f [(1-P_f) c]^{1/2}}{2P_f - 1} \quad (1)$$

$$\text{with } P_f = \frac{\delta_a - \delta_{\text{obs}}}{\delta_a - \delta_m}$$

where P<sub>f</sub>: the population fraction of free N-H protons;

c: molar concentration of **1**;

δ<sub>a</sub>: the limiting chemical shift for the fully H-bond state, determined by extrapolation from δ=f(1/X<sub>1</sub>) dependency, X<sub>1</sub>=molar ratio of **1**;

δ<sub>m</sub>: the limiting chemical shift for the non H-bond state, determined by extrapolation from δ=f(X<sub>1</sub>) dependency, X<sub>1</sub>=molar ratio of **1**;

δ<sub>obs</sub>: observed chemical shift;

Measurements were performed in CDCl<sub>3</sub> using an Bruker AC250 spectrometer. The assignments were made on the base of the COSY and ROESY spectra. Equilibration between hydrogen-bonded and non-hydrogen bonded states for a given N-H proton is almost always fast on the NMR time scale and observed proton chemical shifts are weighted averages of the chemical shifts of contributing states. Variable temperature NH proton experiment were performed for the compound **1** in the range of 253-298 K.

## Experimental Procedure and $^1\text{H}$ NMR spectra for 1-NaX complexes ( $\text{X} = \text{F}^-, \text{Cl}^-, \text{NO}_3^-, \text{CF}_3\text{SO}_3^-$ )

A solution of 2.5 M of **1** in  $\text{CDCl}_3$  and solid salts were briefly ultrasonicated at room temperature, then filtered by gravity. The resulting solutions were studied by  $^1\text{H}$  NMR (Figure S1) and ESI mass spectrometry.

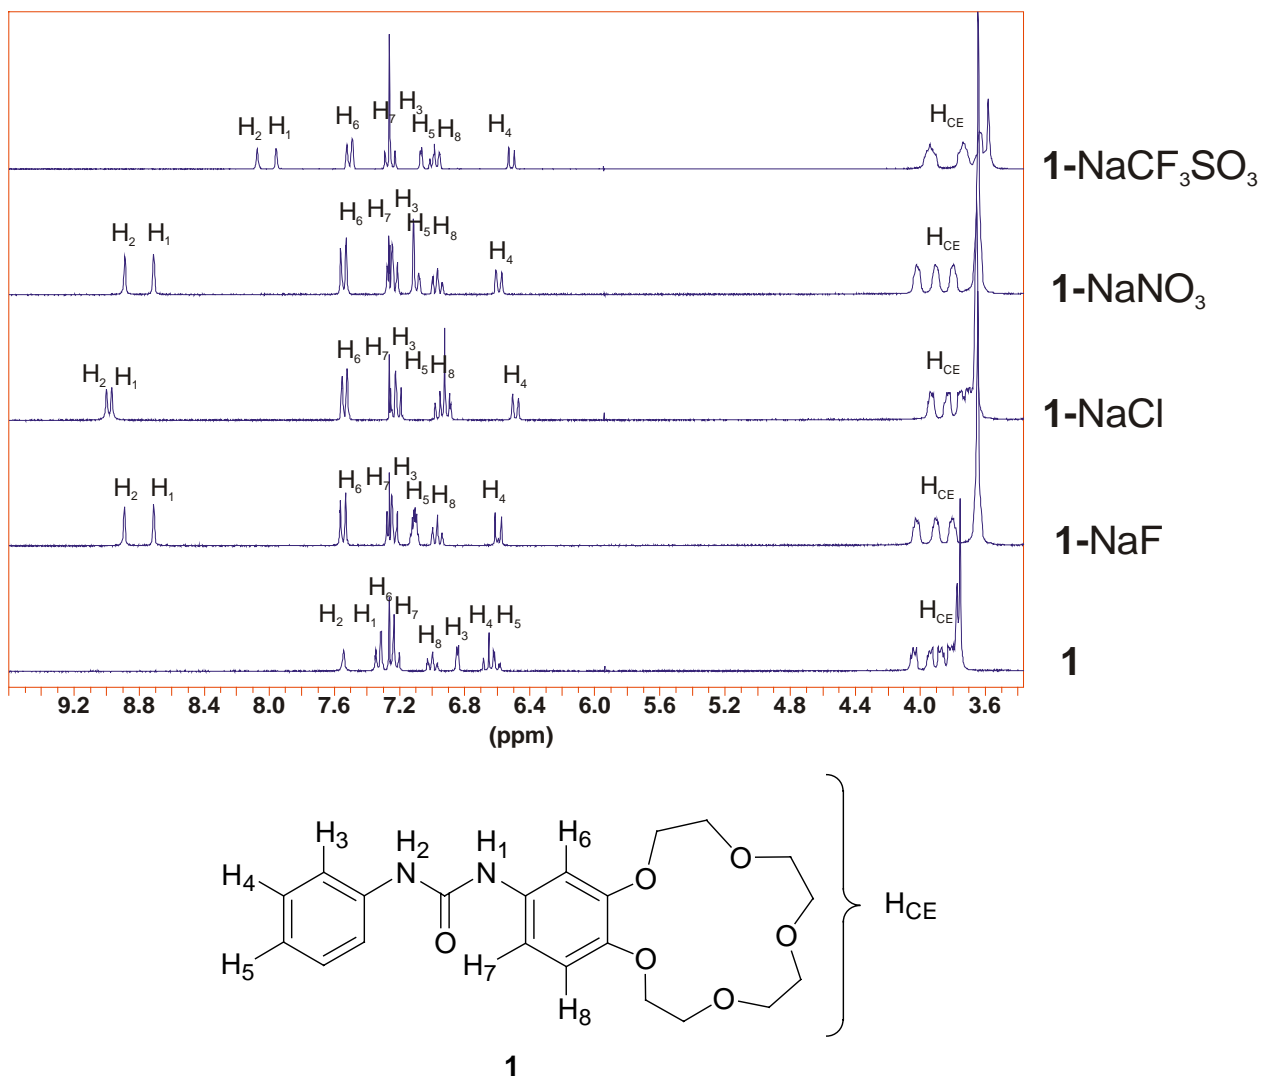

**Figure S1**  $^1\text{H}$  NMR spectra of receptor **1** and of **1-NaX** ( $\text{X} = \text{F}^-, \text{Cl}^-, \text{NO}_3^-, \text{CF}_3\text{SO}_3^-$ ) salts into  $\text{CDCl}_3$  at room temperature

### Crystallographic data for **1**, **1-NaCl** and **1-NaNO<sub>3</sub>**

X-ray diffraction data for **1**, **1-NaCl** and **1-NaNO<sub>3</sub>** crystals, grown by slow diffusion of in *i*-propylether in an acetonitrile solution at room temperature. They were collected at beamline ID11 at the European Synchrotron Facility (ESRF), Grenoble. A wavelength of  $0.50606 \text{ \AA}$  was selected using a double crystal Si (111) monochromator and data were collected with a Bruker “Smart” CDD camera system at fixed  $2\theta$  ( $T=120 \text{ K}$ ). The solutions were solved using direct methods and refined-based on  $F^2$  using independent data  $I > 2\sigma(I)$ - by full matrix least squares methods.

**Crystal data for 1:**  $\text{C}_{21}\text{H}_{26}\text{N}_2\text{O}_6$ ,  $M=402.45$ , colorless plates,  $0.50 \times 0.15 \times 0.15 \text{ mm}$ , monoclinic, space group  $P2_1/n$ ,  $D_c=1.210 \text{ g cm}^{-3}$ ,  $a=19.333(3) \text{ \AA}$ ,  $b=4.8301(7) \text{ \AA}$ ,  $c=24.713(4) \text{ \AA}$ ,  $\alpha=90^\circ$ ,  $\beta=106.876(7)^\circ$ ,  $\gamma=90^\circ$ ,  $V=2208.3(6) \text{ \AA}^3$ ,  $Z=4$ ,  $\mu=0.089 \text{ mm}^{-1}$ . 23046 measured reflections, 6560 unique, 3930 with  $I > 2\sigma(I)$ . Final  $R$  factors are  $R_1=0.0751$  and  $wR_2=0.2061$ ; 340 parameters, maximal residual electron density is  $0.540 \text{ e\AA}^{-3}$ . CCDC reference number 195270

**Crystal data for 1-NaCl:**  $\text{C}_{42}\text{H}_{52}\text{ClN}_4\text{NaO}_{12}$ ,  $M=863.34$ , colorless plates,  $0.35 \times 0.25 \times 0.15 \text{ mm}$ , monoclinic, space group  $P2_1/c$ ,  $D_c=1.181 \text{ g cm}^{-3}$ ,  $a=11.390(2) \text{ \AA}$ ,  $b=36.076(5) \text{ \AA}$ ,  $c=12.420(2) \text{ \AA}$ ,  $\alpha=90^\circ$ ,  $\beta=107.900(7)^\circ$ ,  $\gamma=90^\circ$ ,  $V=4856.4(6) \text{ \AA}^3$ ,  $Z=4$ ,  $\mu=0.146 \text{ mm}^{-1}$ . 31050 measured reflections, 13367 unique, 9062 with  $I > 2\sigma(I)$ . Final  $R$  factors are  $R_1=0.0879$  and  $wR_2=0.0637$ ; 542 parameters, maximal residual electron density is  $1.710 \text{ e\AA}^{-3}$ . CCDC reference number 195271

*Crystal data for 1·NaNO<sub>3</sub>, C<sub>23</sub>H<sub>25</sub>N<sub>4</sub>NaO<sub>9</sub>, M=524.46, colorless plates, 0.40 x 0.15 x 0.10 mm triclinic, space group *P*-1,  $D_c=1.201 \text{ gcm}^{-3}$ ,  $a=8.7388(5) \text{ \AA}$ ,  $b=11.2448(5) \text{ \AA}$ ,  $c=15.318(1) \text{ \AA}$ ,  $\alpha=101.248(4)^\circ$ ,  $\beta=95.301(3)^\circ$ ,  $\gamma=98.076(3)^\circ$ ,  $V=1450.5(2) \text{ \AA}^3$ ,  $Z=2$ ,  $\mu=0.106 \text{ mm}^{-1}$ . 17603 measured reflections, 7546 unique, 5925 with  $I>2\sigma(I)$ . Final *R* factors are  $R_1=0.0728$  and  $wR_2=0.0696$ ; 335 parameters, maximal residual electron density is  $0.780 \text{ e\AA}^{-3}$ . CCDC reference number 195272.*

### **Membrane transport procedure**

Membrane transport experiments were performed with magnetic stirring in a conventional U-tube glass cell at room temperature. The feed phase was a 25 ml of 1M NaX salt; the membrane phase consisted of  $5 \times 10^{-2} \text{ M}$  CHCl<sub>3</sub> solution (25 ml) of **1-3** in chloroform and the strip phase consisted of 25 ml of distilled water. Aliquots (0.01 ml) of both aqueous solution were withdrawn at appropriate intervals. The diffusion coefficient of NaCl has been determined using the initial fluxes method by plotting initial flux value  $J_0$  against  $C_{\text{receptor}}$
